# Supplementary material for: A Novel and Cross-Species Active Mammalian INDY (NaCT) Inhibitor Ameliorates Hepatic Steatosis in Mice with Diet-Induced Obesity
Source: MDPI journal article supplement (doi:10.3390/metabo12080732), 2022-08-08
Supplement: s1 [file s1]

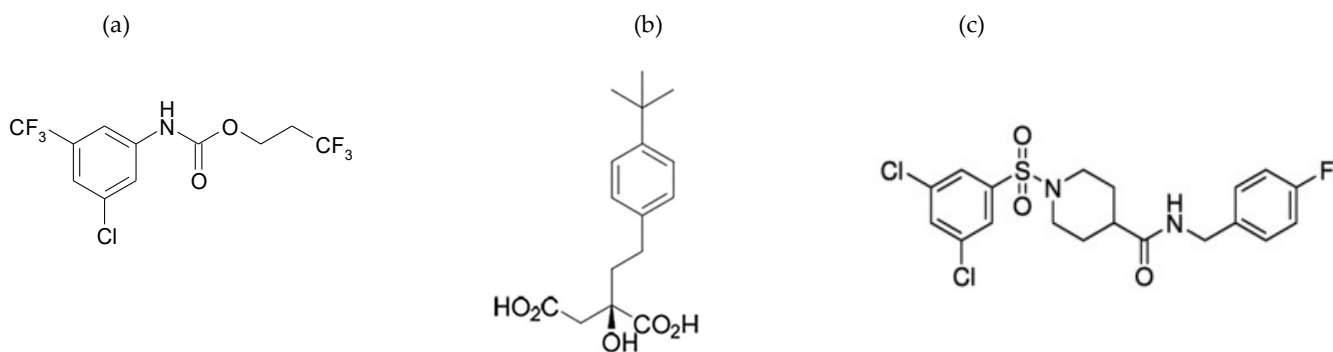

**Figure S1.** Molecular structures of tested compounds (a) ETG-5773, (b) PF-06649298 and (c) BI01383298.

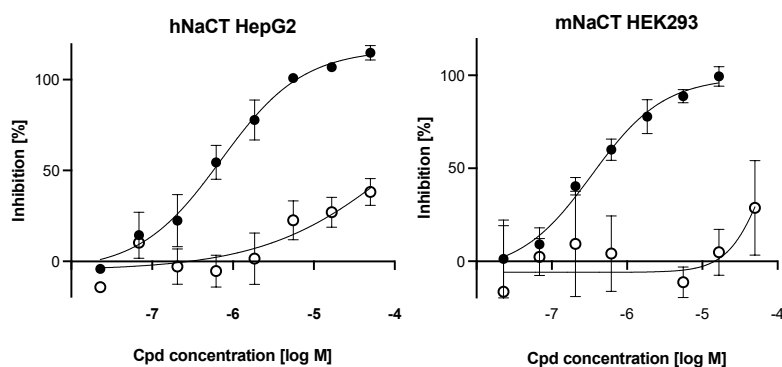

**Figure S2.** Example data for citrate uptake assay of ETG-5773 (filled circles) with a significant less active analogue ETG-5436 (open circles) considered as a negative control.

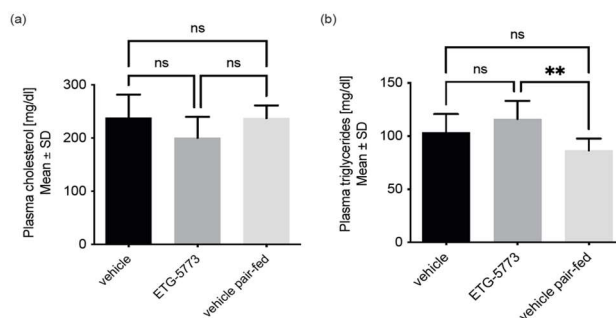

**Figure S3.** Plasma lipid analysis of DIO mice after the 28-day treatment period. (a) plasma cholesterol, (b) plasma triglycerides. Animals were treated orally twice a day with ETG-5773 at 15 mg/kg or with the corresponding vehicle or vehicle in the pair-fed group. \*\*  $p < 0.01$  as indicated, ns: non-significant. ANOVA mean SD,  $n = 12$  vehicle and ETG-5773,  $n = 8$  pair-fed

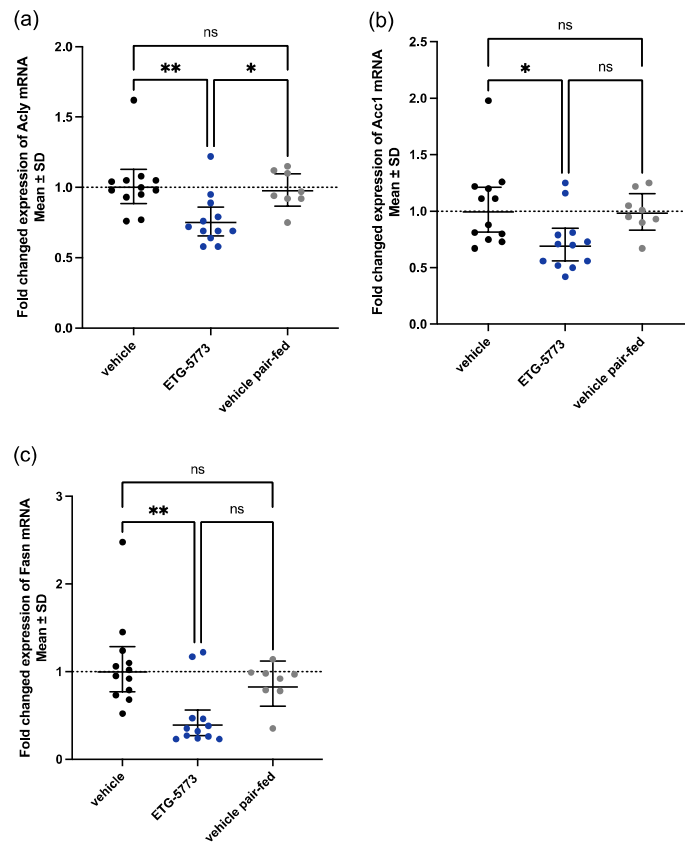

**Figure S4.** mRNA expression levels from additional genes involved in hepatic lipogenesis in liver tissue of DIO mice after the 28-day treatment period. Animals were treated orally twice a day with ETG-5773 at 15 mg/kg or with the corresponding vehicle or vehicle in the pair-fed group: (a) mRNA expression of ATP citrate lyase (*ACLY*) gene; (b) mRNA expression of Acetyl CoA carboxylase 1 (*ACC1*) gene; c) mRNA expression of fatty acid synthetase (*FASN*) \*  $p < 0.05$ , \*\*  $p < 0.01$  as indicated, ns: non-significant. ANOVA mean SD,  $n = 12$  vehicle and ETG-5773,  $n = 8$  pair-fed

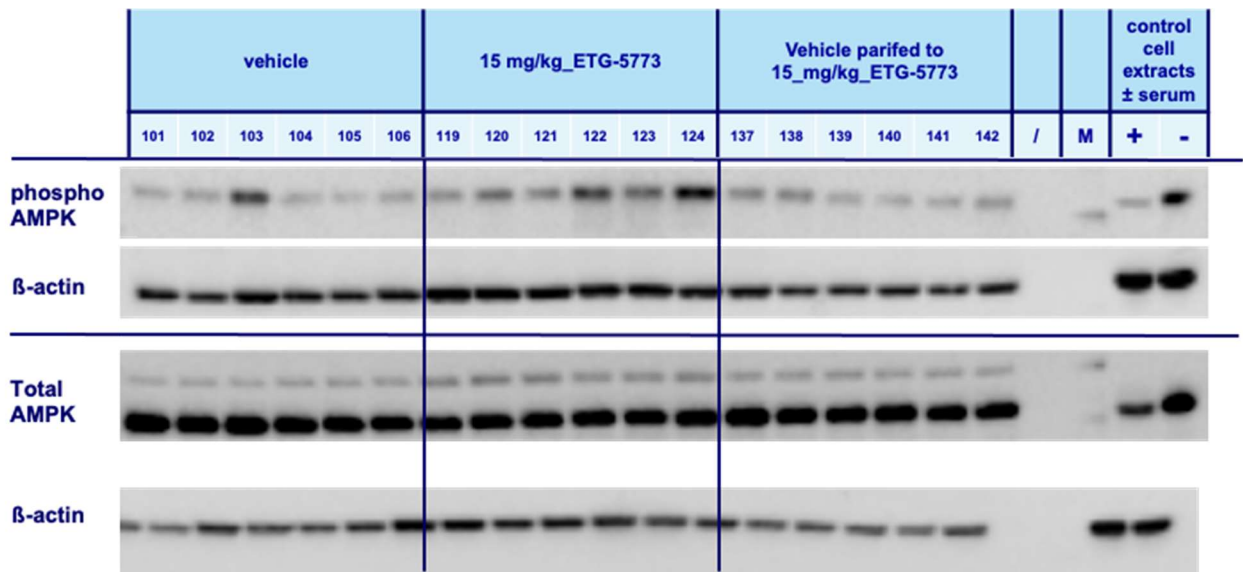

**Figure S5.** Western blot for quantifying adenosine monophosphate-activated protein kinase (AMPK), Thr172 phosphorylated AMPK and β-actin. Animals were treated orally twice a day with ETG-5773 at 15 mg/kg or with the corresponding vehicle or vehicle in the pair-fed group,  $n = 6$  for all groups.
